# Supplementary material
Source: publisher figshare collection journal article supplement (https://acs.figshare.com/ndownloader/files/7010603)
Supplement: Supplementary file 1 [file 7010603]

## Supporting Information

### Comprehensive Study on Chain-End Transformation of Polymer-Iodides with Amines for Synthesizing Various Chain-End Functionalized Polymers

*Chen Chen, Longqiang Xiao, Atsushi Goto\**

Division of Chemistry and Biological Chemistry, School of Physical and Mathematical Sciences,  
Nanyang Technological University, 21 Nanyang Link, 637371 Singapore

#### 1. Experimental Section

**Materials.** Methyl methacrylate (MMA) (>99.8%, Tokyo Chemical Industry (TCI), Japan), styrene (St) (>99%, TCI), butyl acrylate (BA) (>99%, TCI), 2-iodo-2-methylpropionitrile (2-cyano-2-propyl iodide (CP-I)) (>95%, TCI), tetrabutylammonium iodide (Bu<sub>4</sub>NI) (>98%, TCI), 2,2'-azobis(2-methylpropionitrile) (AIBN) (98%, Wako Pure Chemical, Japan), 2-phenylethylamine (>98%, TCI), 1-aminopropan-2-amine (>98%, TCI), 3-aminopropyltriethoxysilane (>98%, TCI), 2-aminoethanethiol (>95%, TCI), 2-aminoethanol (>99%, TCI), 4-amino-1-butanol (>98%, TCI), ethylenediamine (>99%, Kanto Chemical, Japan), 1,4-diaminobutane (>98%, TCI), 1,6-diaminohexane (>99%, TCI), 2-phenylethanethiol (>97%, TCI), diethylene glycol dimethyl ether (diglyme) (>99%, TCI), 1-butanol (>99%, Kanto), *N,N*-dimethylformamide (DMF) (>99.5%, Kanto), hexane (>99%, International Scientific Pte Ltd., Singapore), methanol (>99%, International Scientific), tetrahydrofuran (THF) (>99.5%, Kanto), trans-2-[3-(4-*t*-butylphenyl)-2-methyl-2-propenylidene]malononitrile (DCTB) (>99%, Fluka Chemicals Ltd., UK), dithranol (>98%, Fluka), NaI (>99.5%, Kanto), and sodium trifluoroacetate (NaTFA) (>98%, TCI) were used as received.

**Analytical GPC.** The GPC analysis was performed on a Shodex GPC-101 liquid chromatograph (Tokyo, Japan) equipped with two Shodex KF-804L mixed gel columns ( $300 \times 8.0$  mm; bead size =  $7 \mu\text{m}$ ; pore size =  $20\text{--}200 \text{ \AA}$ ). The eluent was THF at a flow rate of  $1.0 \text{ mL/min}$  ( $40^\circ\text{C}$ ). Sample detection and quantification were conducted using a Shodex differential refractometer RI-101 calibrated with known concentrations of polymer in solvent. The monomer conversion was determined from the peak area. The column system was calibrated with standard polystyrenes and poly(methyl methacrylate)s.

**Preparative GPC.** Polymers were purified with a preparative GPC (LC-9204, Japan Analytical Industry, Tokyo) equipped with JAIGEL 1H and 2H polystyrene gel columns ( $600 \times 40$  mm; bead size =  $16 \mu\text{m}$ ; pore size =  $20\text{--}30$  (1H) and  $40\text{--}50$  (2H)  $\text{\AA}$ ). Chloroform was used as eluent at a flow rate of  $14 \text{ mL/min}$  (room temperature).

**NMR.** The NMR spectra of the polystyrene (PSt) and poly(methyl methacrylate) (PMMA) in Figure 3 were recorded on an AV500 spectrometer ( $500 \text{ MHz}$ ) (Bruker, Germany) at ambient temperature;  $^1\text{H}$ : spectral width  $5000.00 \text{ Hz}$ , acquisition time  $6.554 \text{ sec}$ , and pulse delay  $1.000 \text{ sec}$ . The NMR spectrum of poly(butyl acrylate) (PBA) in Figure 5 was recorded on a BBFO400 spectrometer ( $400 \text{ MHz}$ ) (Bruker) at ambient temperature;  $^1\text{H}$ : spectral width  $4000.00 \text{ Hz}$ , acquisition time  $8.192 \text{ sec}$ , and pulse delay  $1.000 \text{ sec}$ .

**MALDI-TOF-MS.** The matrix assisted laser desorption/ionization time-of-flight mass spectrometry (MALDI-TOF-MS) spectra were recorded on a JMS-S3000 SpiralTOF (JEOL Ltd., Japan) at an accelerating potential of  $20 \text{ kV}$  in the positive spiral mode. We prepared the polymer solution (PBA:  $10 \text{ g/L}$ , PSt:  $15 \text{ g/L}$ , or PMMA:  $10 \text{ g/L}$ , in THF in all cases), matrix solution (DCTB:  $10 \text{ g/L}$ , or dithranol:  $60 \text{ g/L}$ , in THF in both cases), and cationization agent solution (NaI:  $10 \text{ g/L}$  in methanol, or NaTFA:  $10 \text{ g/L}$  in THF). The MALDI-TOF-MS samples were prepared by the dried droplet method.<sup>1</sup> For the PBA samples, the PBA solution (in THF) and the DCTB solution (in THF) were mixed in a ratio of  $1/4$  (v/v). First,  $5 \mu\text{L}$  of the NaI solution (in methanol) was deposited on the target plate and dried in the air at room temperature. Second,  $5 \mu\text{L}$  of the mixed PBA/DCTB solution (in THF) was deposited on the same

target plate spot and dried in the air at room temperature. The solutions were deposited in this two-step manner, because NaI is not soluble in THF. For the PSt and PMMA samples, NaTFA was used as a cationization agent which is soluble in THF. The polymer, matrix, and cationization agent solutions (all in THF) were mixed together in ratios of 1/5/1 (v/v/v) for PMMA/DCTB/NaTFA and 1/2/1 (v/v/v) for PSt/dithranol (or DCTB)/NaTFA. Then, 5  $\mu$ L of the mixed solution was deposited on the target plate and dried in the air at room temperature.

**Preparation of PBA-I.** A mixture of BA (20 g (8 M)), CP-I (80 mM), and Bu<sub>4</sub>NI (320 mM) was heated in a 100 mL flask at 110 °C for 6 h under an argon atmosphere with magnetic stirring, yielding a PBA-I with  $M_n = 5200$  and  $M_w/M_n = 1.36$  (monomer conversion = 36.7%) (before purification). The reaction mixture was diluted with THF, and the polymer was reprecipitated in a water/methanol mixture (50/50 wt%). After further purification with preparative GPC, a PBA-I with  $M_n = 5300$  and  $M_w/M_n = 1.36$  was obtained (Table 1 (entry 1)).

**Preparation of PSt-I.** A mixture of St (10 g (8 M)), CP-I (160 mM), AIBN (60 mM), and Bu<sub>4</sub>NI (40 mM) was heated in a 100 mL flask at 80 °C for 9 h under an argon atmosphere with magnetic stirring, yielding a PSt-I with  $M_n = 4200$  and  $M_w/M_n = 1.25$  (monomer conversion = 85.0%) (before purification). The reaction mixture was diluted with THF, and the polymer was reprecipitated in methanol. After further purification with preparative GPC, a PSt-I with  $M_n = 4500$  and  $M_w/M_n = 1.21$  was obtained (Table 1 (entry 2)).

**Preparation of PMMA-I.** A mixture of MMA (10 g (8 M)), CP-I (80 mM), and Bu<sub>4</sub>NI (80 mM) was heated in a 100 mL flask at 70 °C for 35 min under an argon atmosphere with magnetic stirring, yielding a PMMA-I with  $M_n = 3000$  and  $M_w/M_n = 1.16$  (monomer conversion = 27.1%) (before purification). The reaction mixture was diluted with THF, and the polymer was reprecipitated in hexane. After purification with preparative GPC, a PMMA-I with  $M_n = 3100$  and  $M_w/M_n = 1.15$  was obtained (Table 1 (entry 3)).

**Chain-End Functionalization.** A mixture of a polymer-I (20 wt%), an amine (20 eq or 2 eq), and a solvent (80 wt%) in a reaction tube was capped with a stopcock in the atmospheric air, heated at a prescribed temperature in the dark for a prescribed time with magnetic stirring, and quenched to room temperature. The mixture was diluted by THF, and then the polymer was reprecipitated in a non-solvent (methanol/water (50/50 wt%) for PBA, methanol for PSt, and hexane for PMMA). The polymer was further purified with preparative GPC and dried overnight. The obtained polymer was subjected to MALDI-TOF-MS and  $^1\text{H}$  NMR analyses.

## 2. MALDI-TOF-MS Spectra

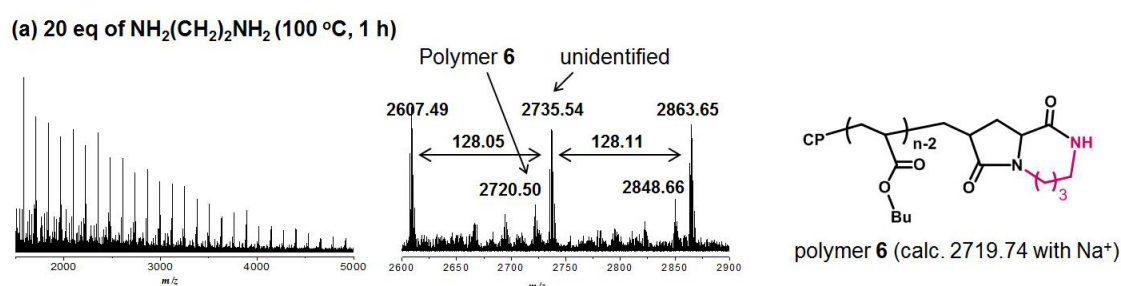

**Figure S1.** MALDI-TOF-MS spectrum of polymer obtained with a reaction of PBA-I (polymer 1) (1 eq, 20 wt%) with  $\text{NH}_2(\text{CH}_2)_4\text{NH}_2$  (20 eq) in diglyme (40 wt%) and 1-butanol (40 wt%) at 100 °C for 1 h.

(a) 5 eq of  $\text{NH}_2(\text{CH}_2)_2\text{SH}$  (100 °C, 8 h) (Table 3 (entry 6))

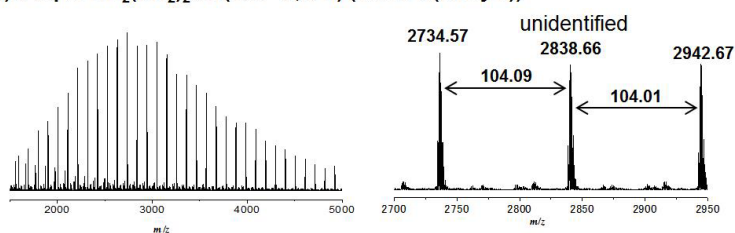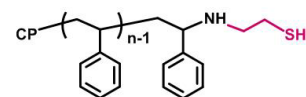

polymer **8** (calc. 2768.63 with  $\text{Na}^+$ )

(b) 5 eq of  $\text{NH}_2(\text{CH}_2)_2\text{NH}_2$  (100 °C, 8 h) (Table 3 (entry 8))

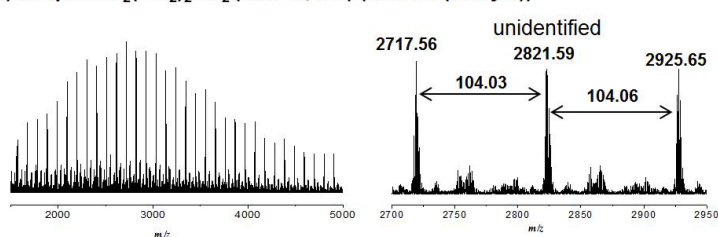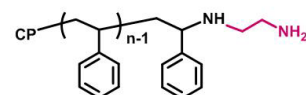

polymer **8** (calc. 2751.67 with  $\text{Na}^+$ )

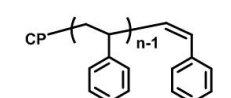

PSt-macromonomer  
(calc. 2795.66 with  $\text{Na}^+$ )

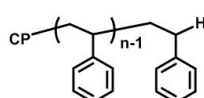

PSt-H  
(calc. 2797.68 with  $\text{Na}^+$ )

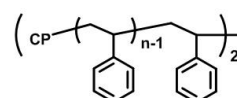

CP-PSt-PSt-CP  
(calc. 2864.72 with  $\text{Na}^+$ )

**Figure S2.** MALDI-TOF-MS spectra of polymers obtained with reactions of PSt-I (polymer **7**) with  $\text{NH}_2\text{R}$  in Table 3 (entries 6 and 8). The amines are given in the figure.

(a) 20 eq of  $\text{NH}_2(\text{CH}_2)_2\text{SH}$  with polymer **10** (120 °C, 48 h) (Table 5 (entry 5))

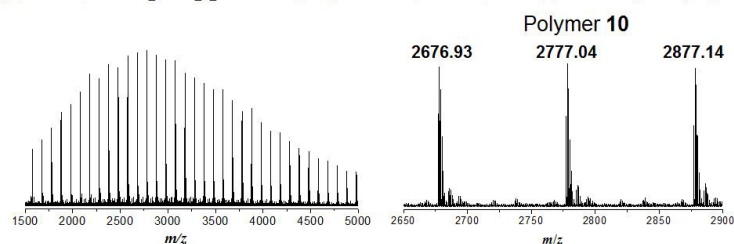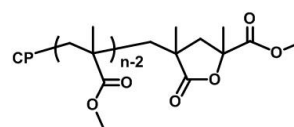

polymer **10** (calc. 2677.38 with  $\text{Na}^+$ )

(b) 20 eq of  $\text{NH}_2(\text{CH}_2)_2\text{NH}_2$  with polymer **10** (120 °C, 48 h) (Table 5 (entry 7))

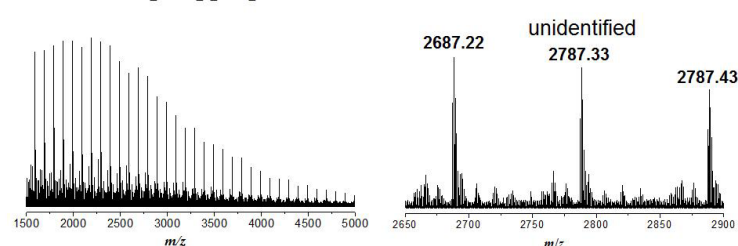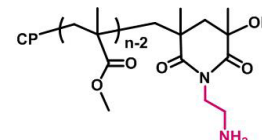

polymer **12** (calc. 2705.42 with  $\text{Na}^+$ )

**Figure S3.** MALDI-TOF-MS spectra of polymers obtained with reactions of polymer **10** with  $\text{NH}_2\text{R}$  in Table 5 (entries 5 and 7). The amines are given in the figure.

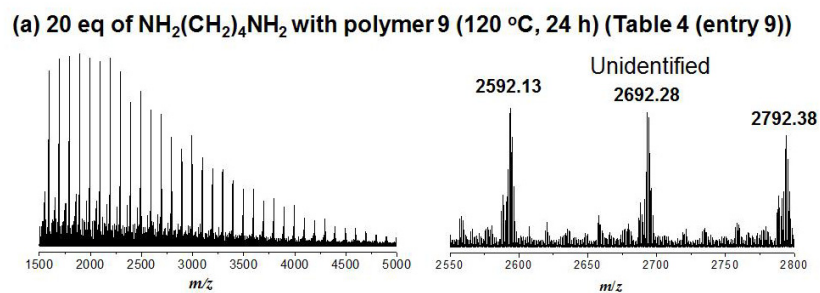

**Figure S4.** MALDI-TOF-MS spectrum of polymers obtained with a reaction of PMMA-I (polymer 9) with  $\text{NH}_2(\text{CH}_2)_2\text{NH}_2$  in Table 4 (entry 9).

## Reference

- (1) Kim, K.; Hasneen, A.; Paik, H.; Chang, T. MALDI-TOF MS characterization of polystyrene synthesized by ATRP. *Polymer* **2013**, 54, 6133-6139.
